# Supplementary material for: Repurposing of KLF5 activates a cell cycle signature during the progression from a precursor state to oesophageal adenocarcinoma
Source: eLife. 2020 Sep 3;9:e57189. doi: 10.7554/eLife.57189 (PMC7544504; doi:10.7554/eLife.57189)
Supplement: Supplementary file 11. [file elife-57189-supp11.xlsx]

## Sheet: Legend
Table S11. List of PCR primers used in RT-qPCR and ChIP-qPCR experiments.

## Sheet: RT-qPCR primers
Gene	Forward primers (5'-3')	Reverse primer (5'-3')	ADS numbers
KLF5	AAGTCCAGATAGACAAGCAGAG	CAGGGTAATCGCAGTAGTGG	5905/5906
CCNE1	AGGTTTCAGGGTATCAGTGG	CTCTGTGGGTCTGTATGTTGTG	6740/6741
CDC25B	GACCTGATGTGTCTCAGTCCT	ATCCATCATCTTCCTCAGTATCC	6742/6743
KIF14	CGACTAAAGGAAGGTGTGAG	GTTGACTATTAAACGGGCTTGG	6744/6745
CLSPN	ACAGACAAGGAAGAGGAAGAC	GTGCCAGATCATTACCAGAG	6746/6747
NR4A1	GGGGAGTGCACAGAAGAACT	AATGTGGCTTGCACCTGTTC	4866/4867
GAPDH	ACAGTCAGCCGCATCTTCTT	TTGATTTTGGAGGGATCTCG	2184/2185

## Sheet: ChIP-qPCR primers
Primer	Sequence (5'-3')	ADS number
CCNE1_1_F	TGTGGAATGCTCTCCAGCAG	6761
CCNE1_1_R	GGCAAAAGCCCCTTGTGATG	6762
CCNE1_prom_F	TGACGGATGAATGGACAGGC	6763
CCNE1_prom_R	GGCCTAGAACCAAGGCTTCA	6764
CDC25B_1_F	GGACGGAAGGTAAGAAGCGT	6765
CDC25B_1_R	GGGTTCTGCGTGCCAGTAAG	6766
CLSPN_prom_F	CCAATCCAGAGGGGGCTTTC	6767
CLSPN_prom_R	CAAAGGTCAAAGACCACGGC	6768
FGF3_1_F	CCATGCCCTTCAGATGTGGT	6769
FGF3_1_R	CCAACGTTGCACACTCACTG	6770
KIF14_prom_F	CCCAGAAGGCCGCAATTTGA	6773
KIF14_prom_R	ATTCAGAGACGGCTACCGGA	6774
TFAP2E_1_F	TGTGTGTTTTGGGGTGTGGA	6777
TFAP2E_1_R	CTCATGGCCCTGAAGCAGAA	6778
