# Supplementary figures and images for: Repurposing of KLF5 activates a cell cycle signature during the progression from a precursor state to oesophageal adenocarcinoma
Source: eLife journal article supplement (doi:10.7554/elife.57189), 2020-09-03

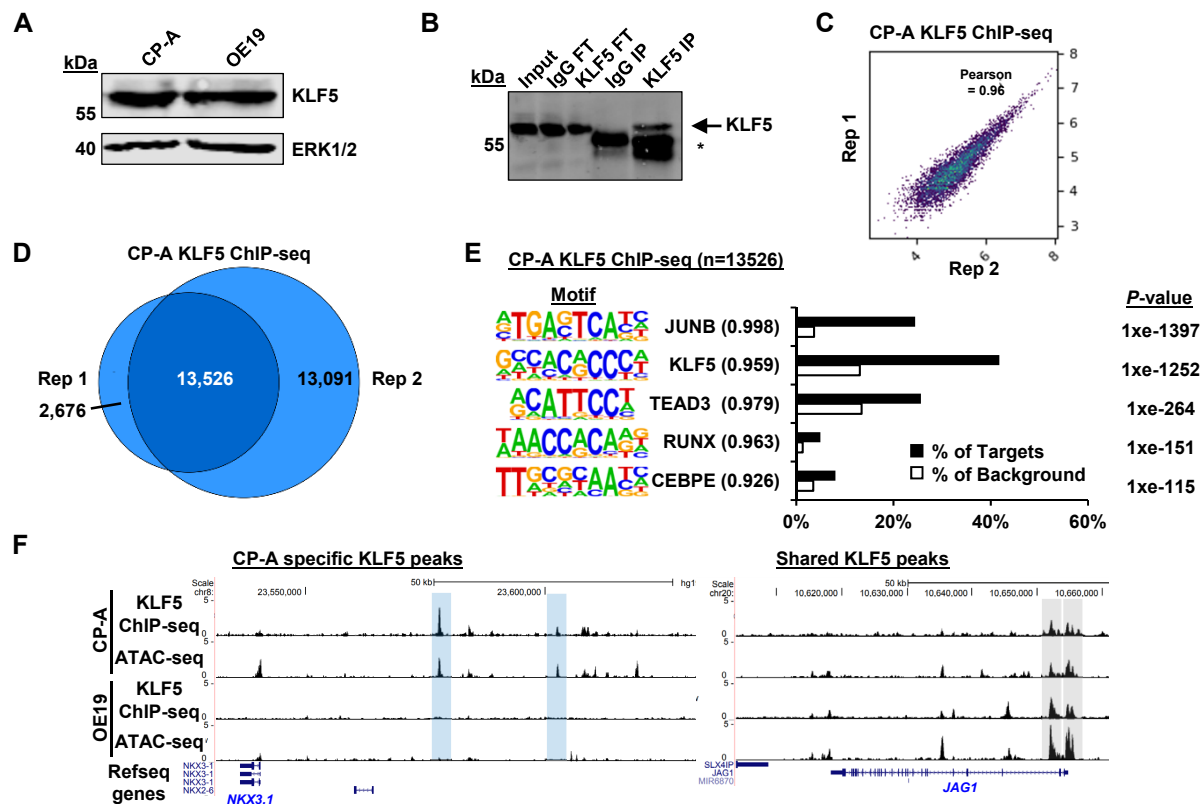

Figure 4-figure supplement-1.

Supplement: supp [file elife-57189-supp-v1.zip]

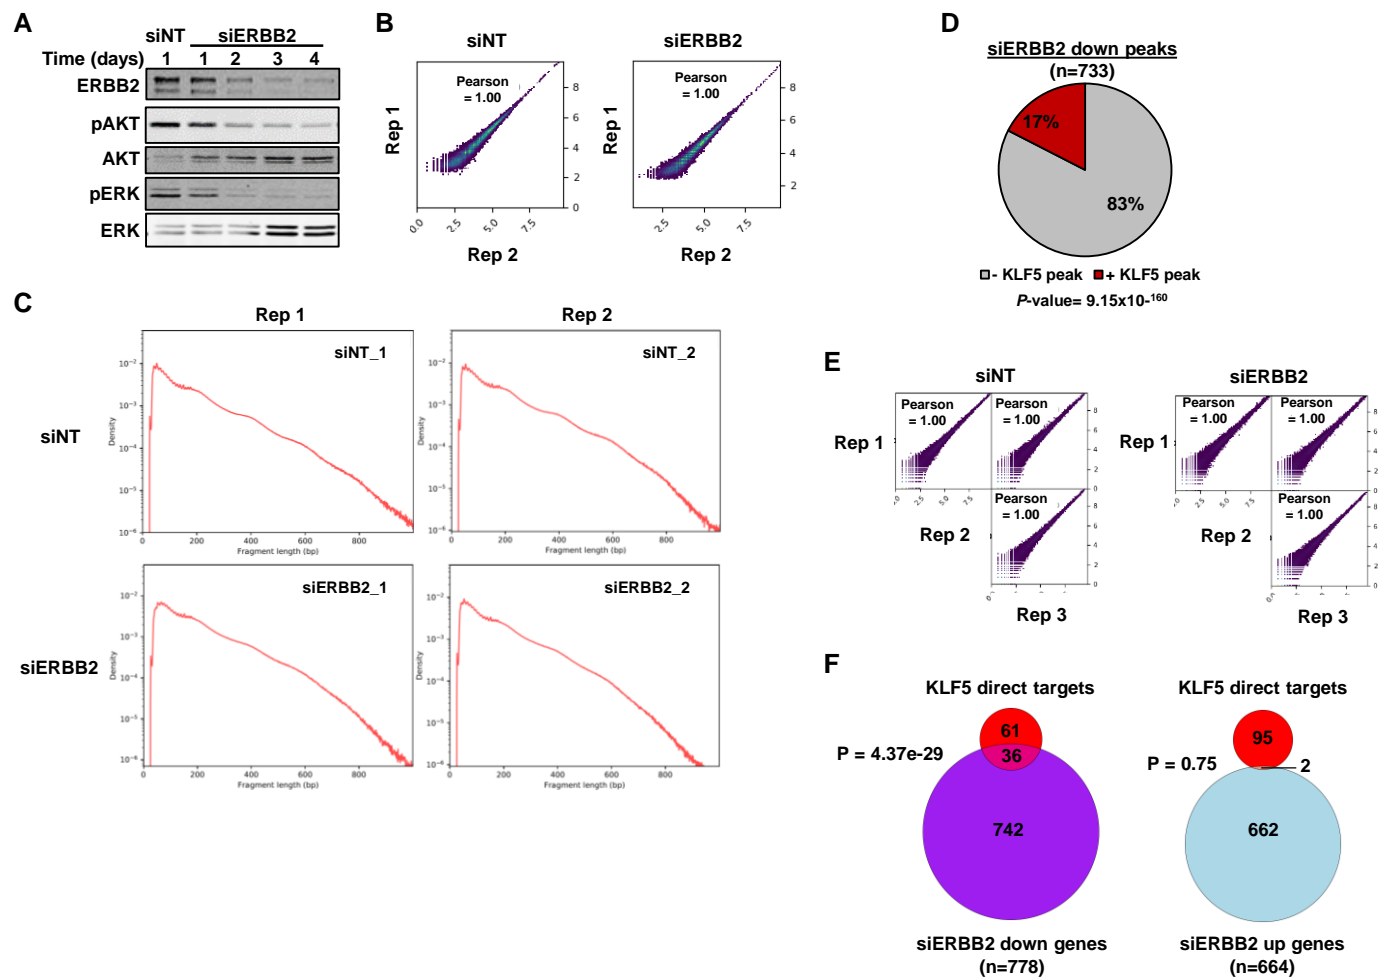

Figure 5-figure supplement 1.

Supplement: supp [file elife-57189-supp-v1.zip]

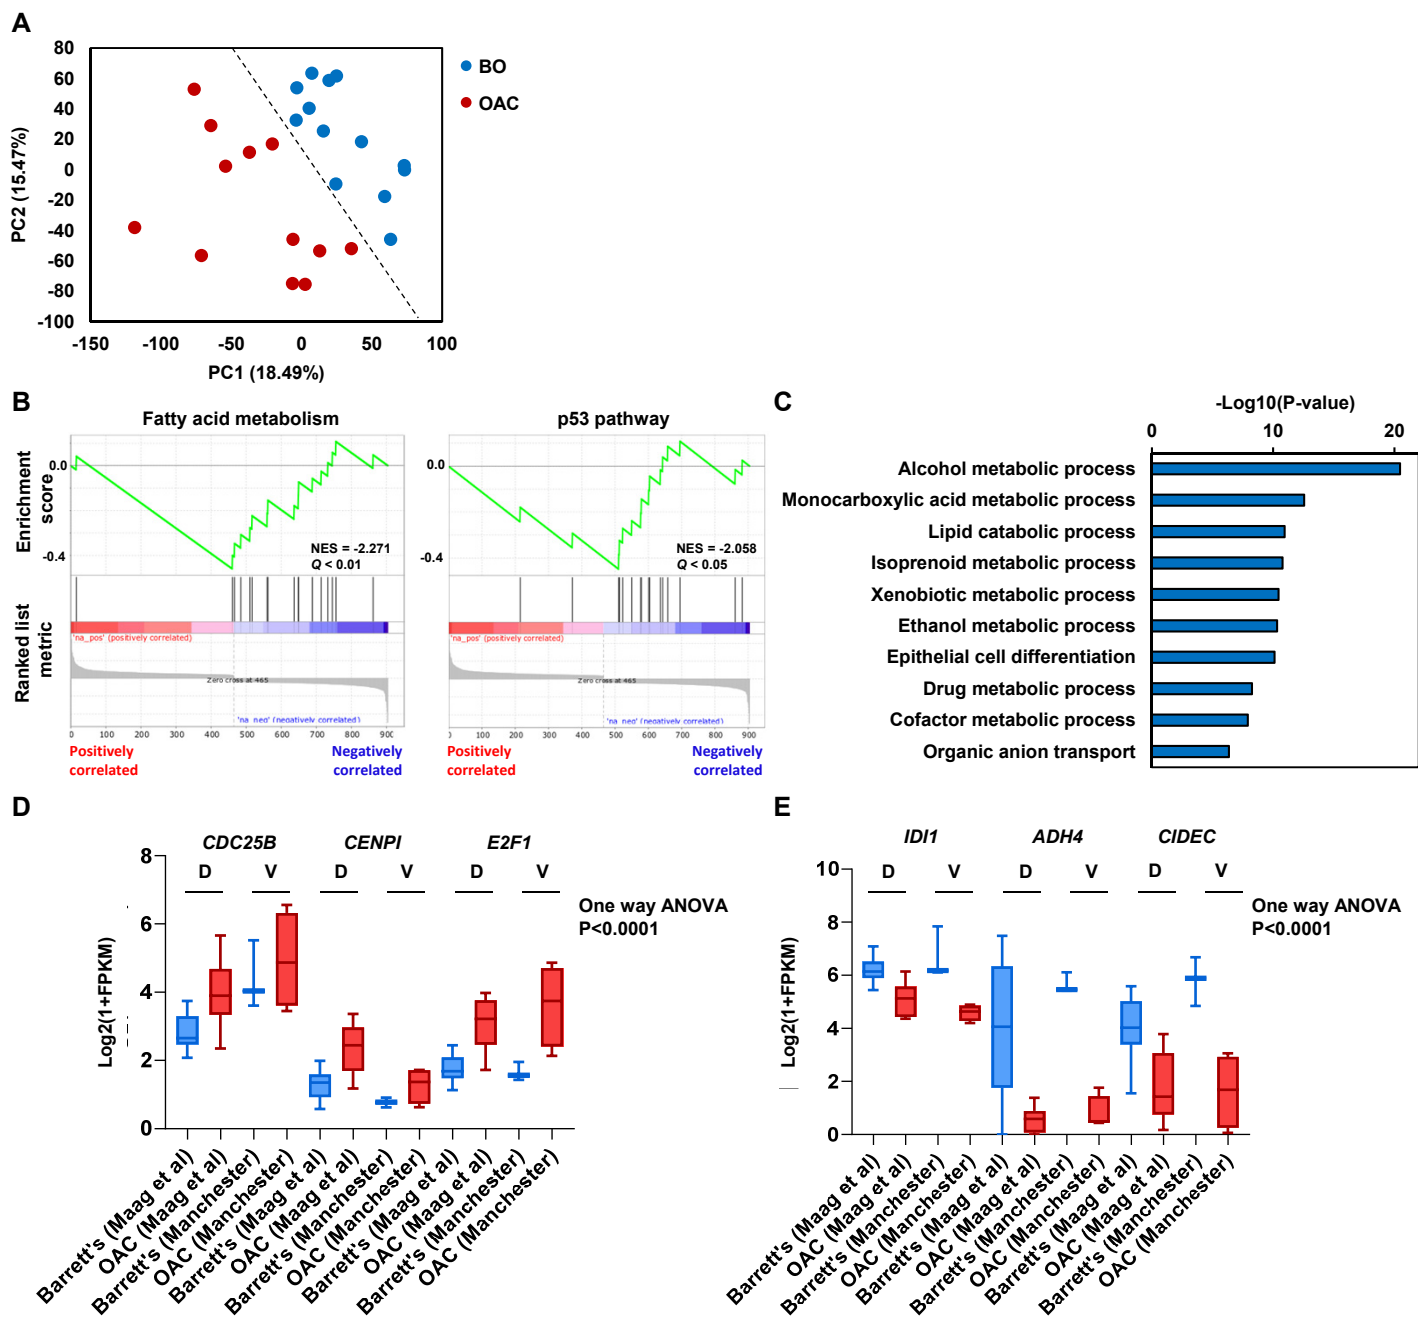

Figure 1- supplement 1.

Supplement: supp [file elife-57189-supp-v1.zip]

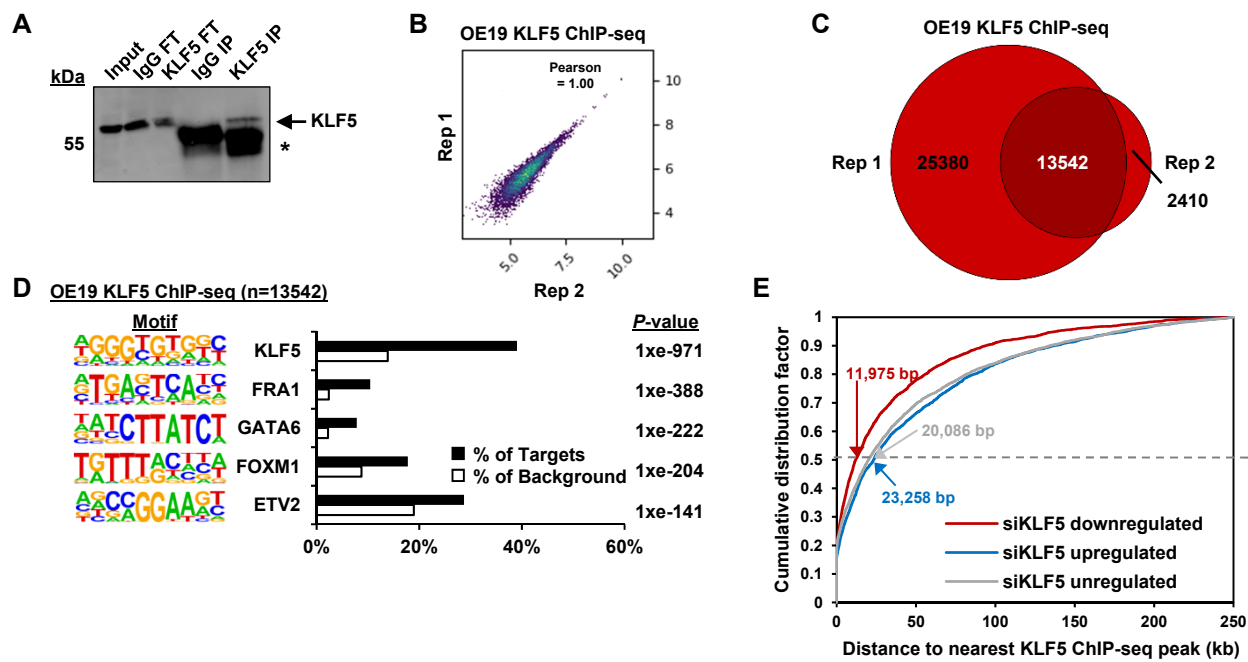

Figure 3- figure supplement 2.

Supplement: supp [file elife-57189-supp-v1.zip]

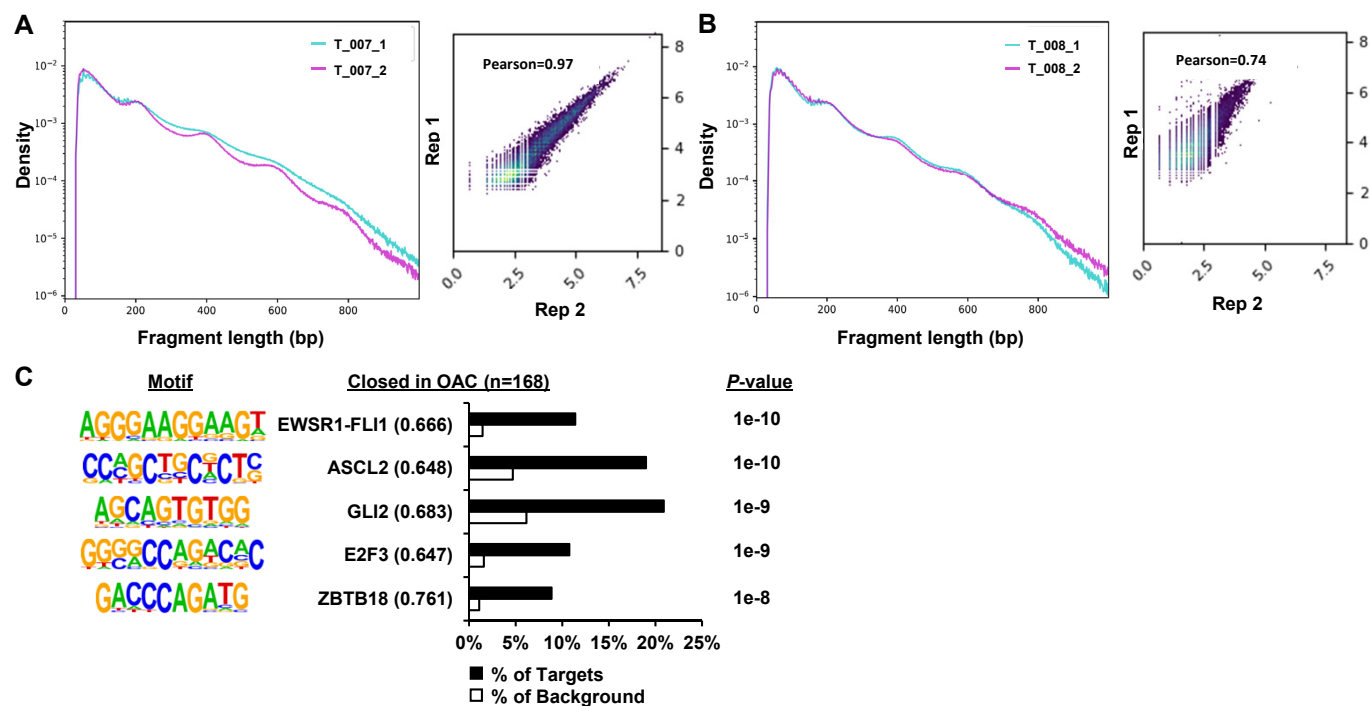

Figure 2- figure supplement 1.

Supplement: supp [file elife-57189-supp-v1.zip]

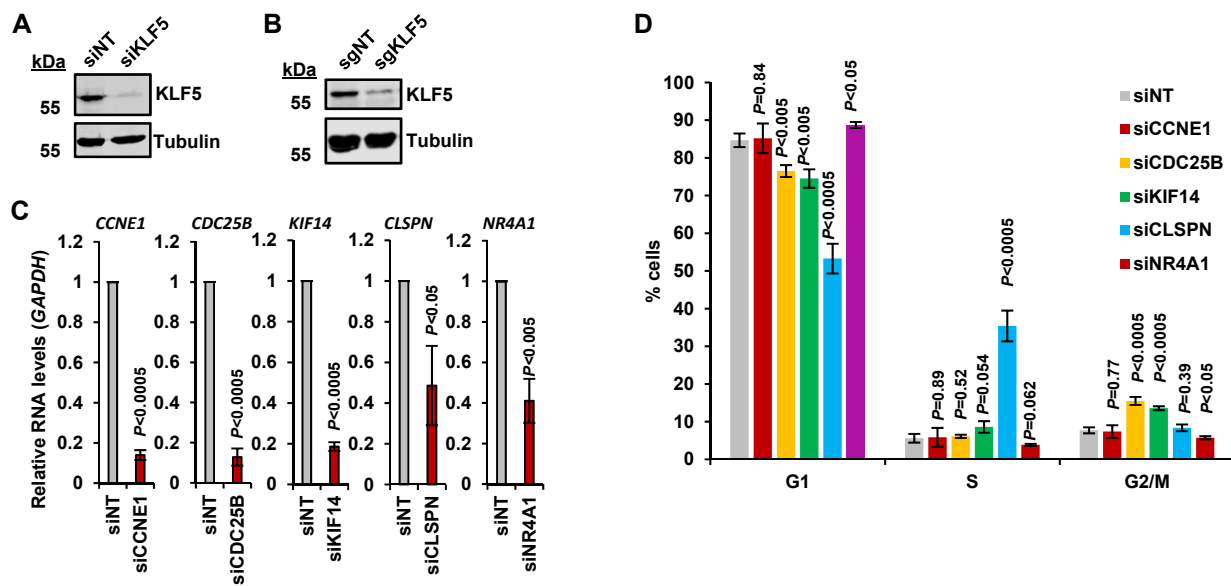

Figure 5-figure supplement 3.

Supplement: supp [file elife-57189-supp-v1.zip]

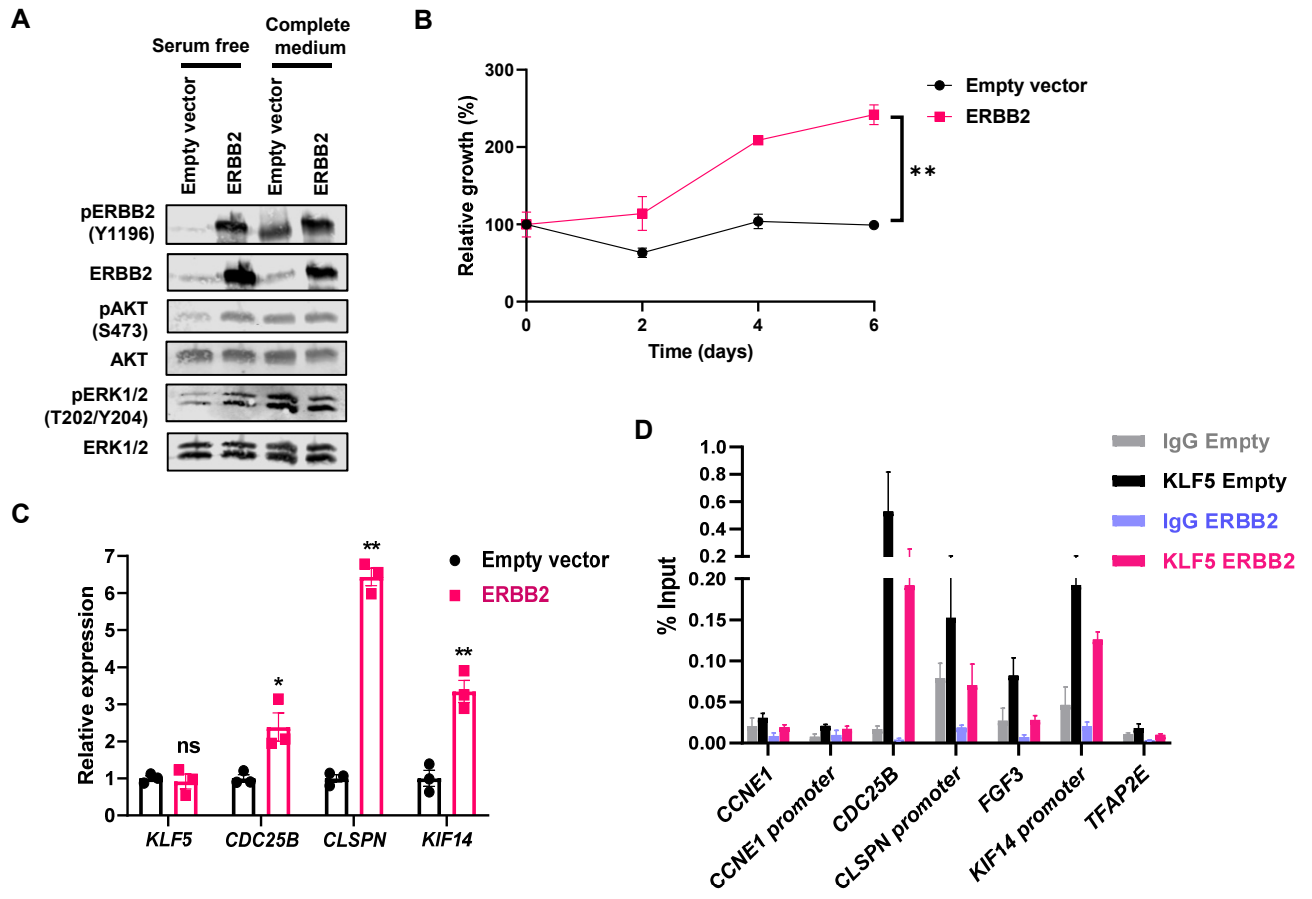

Figure 5-figure supplement 2.

Supplement: supp [file elife-57189-supp-v1.zip]

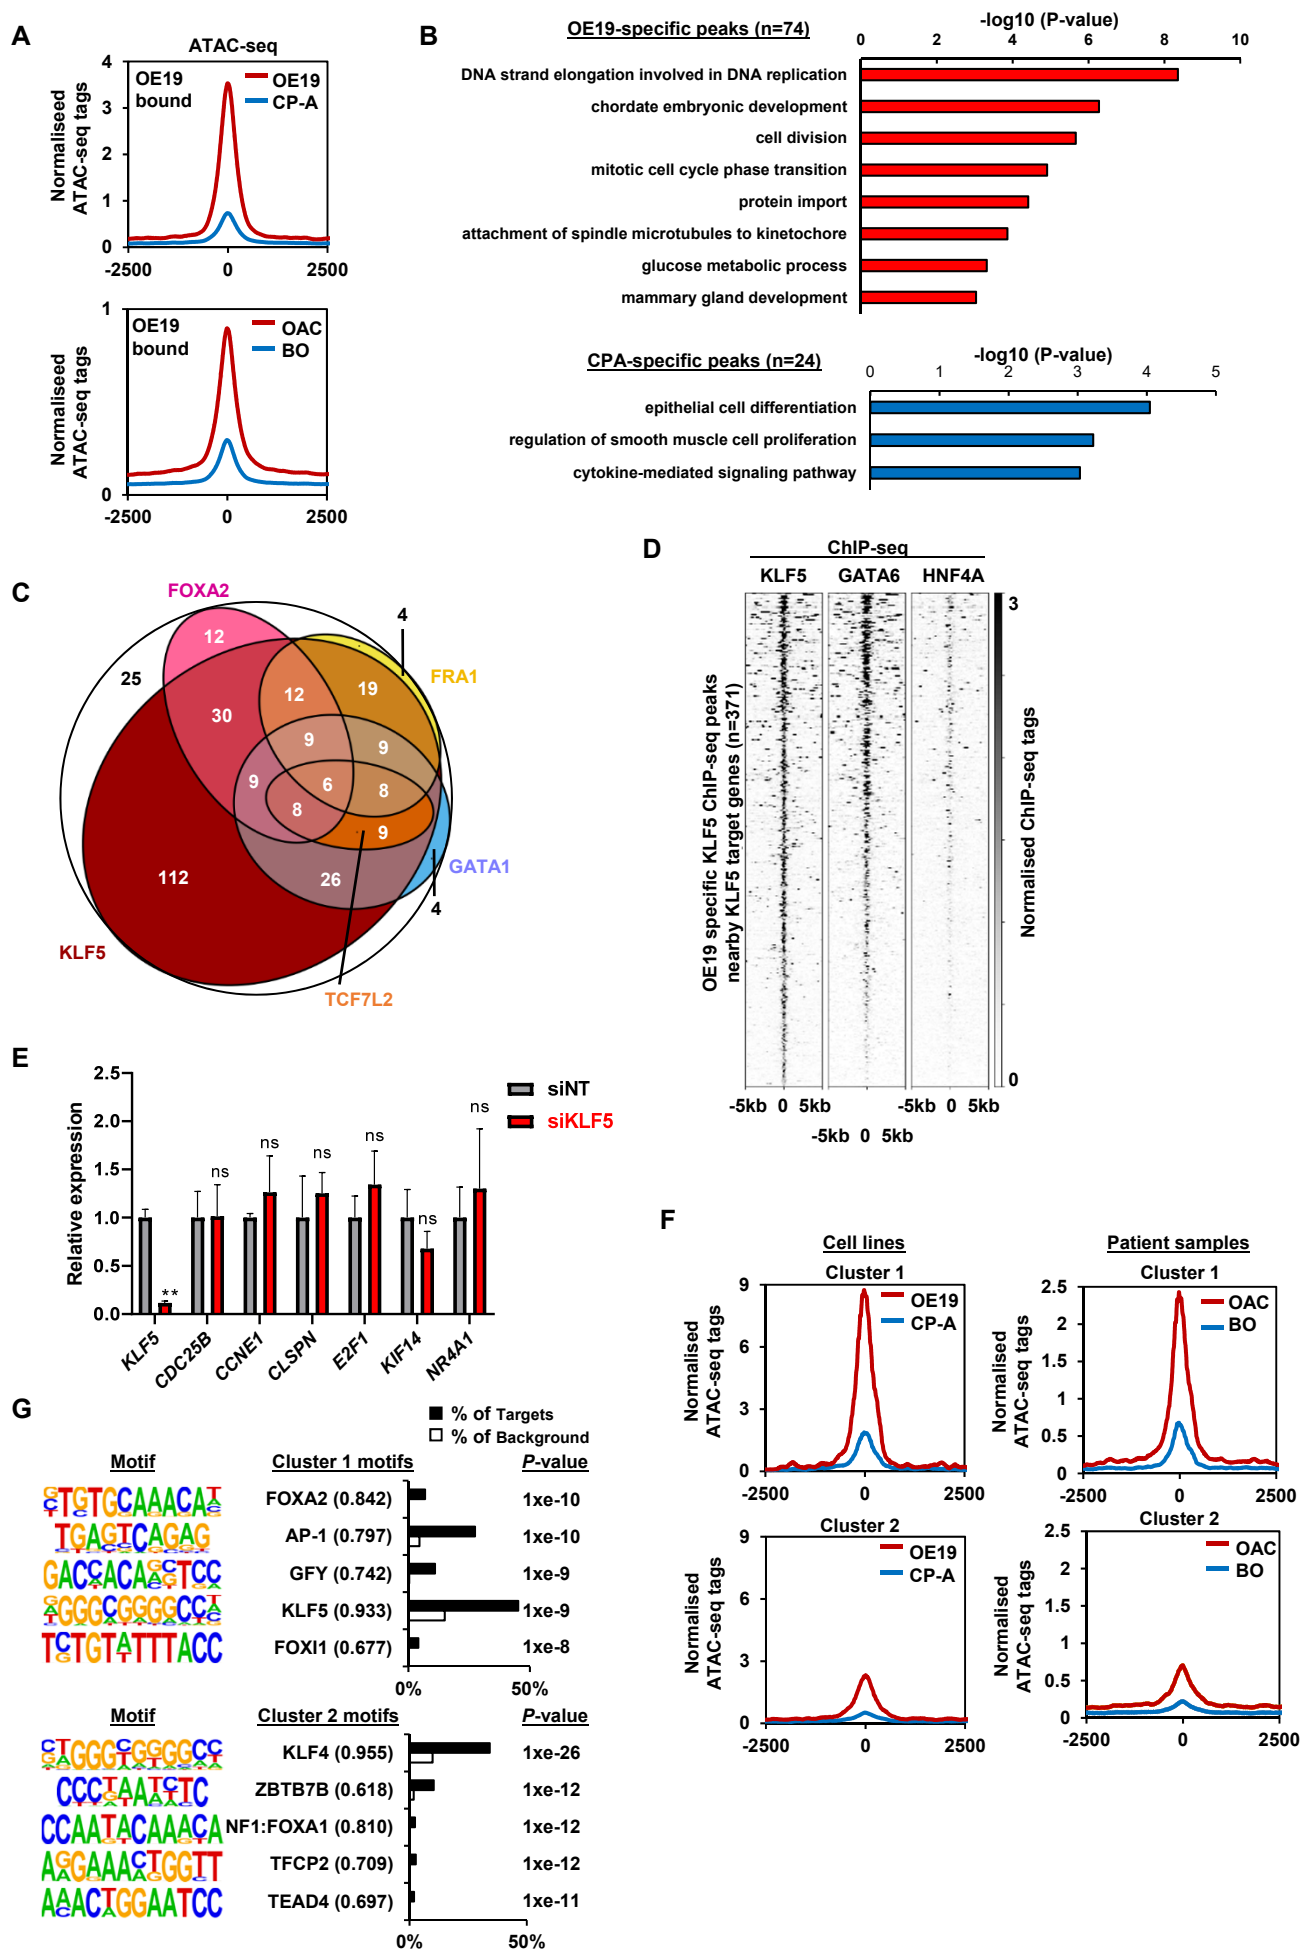

Figure 4-figure supplement-2.

Supplement: supp [file elife-57189-supp-v1.zip]

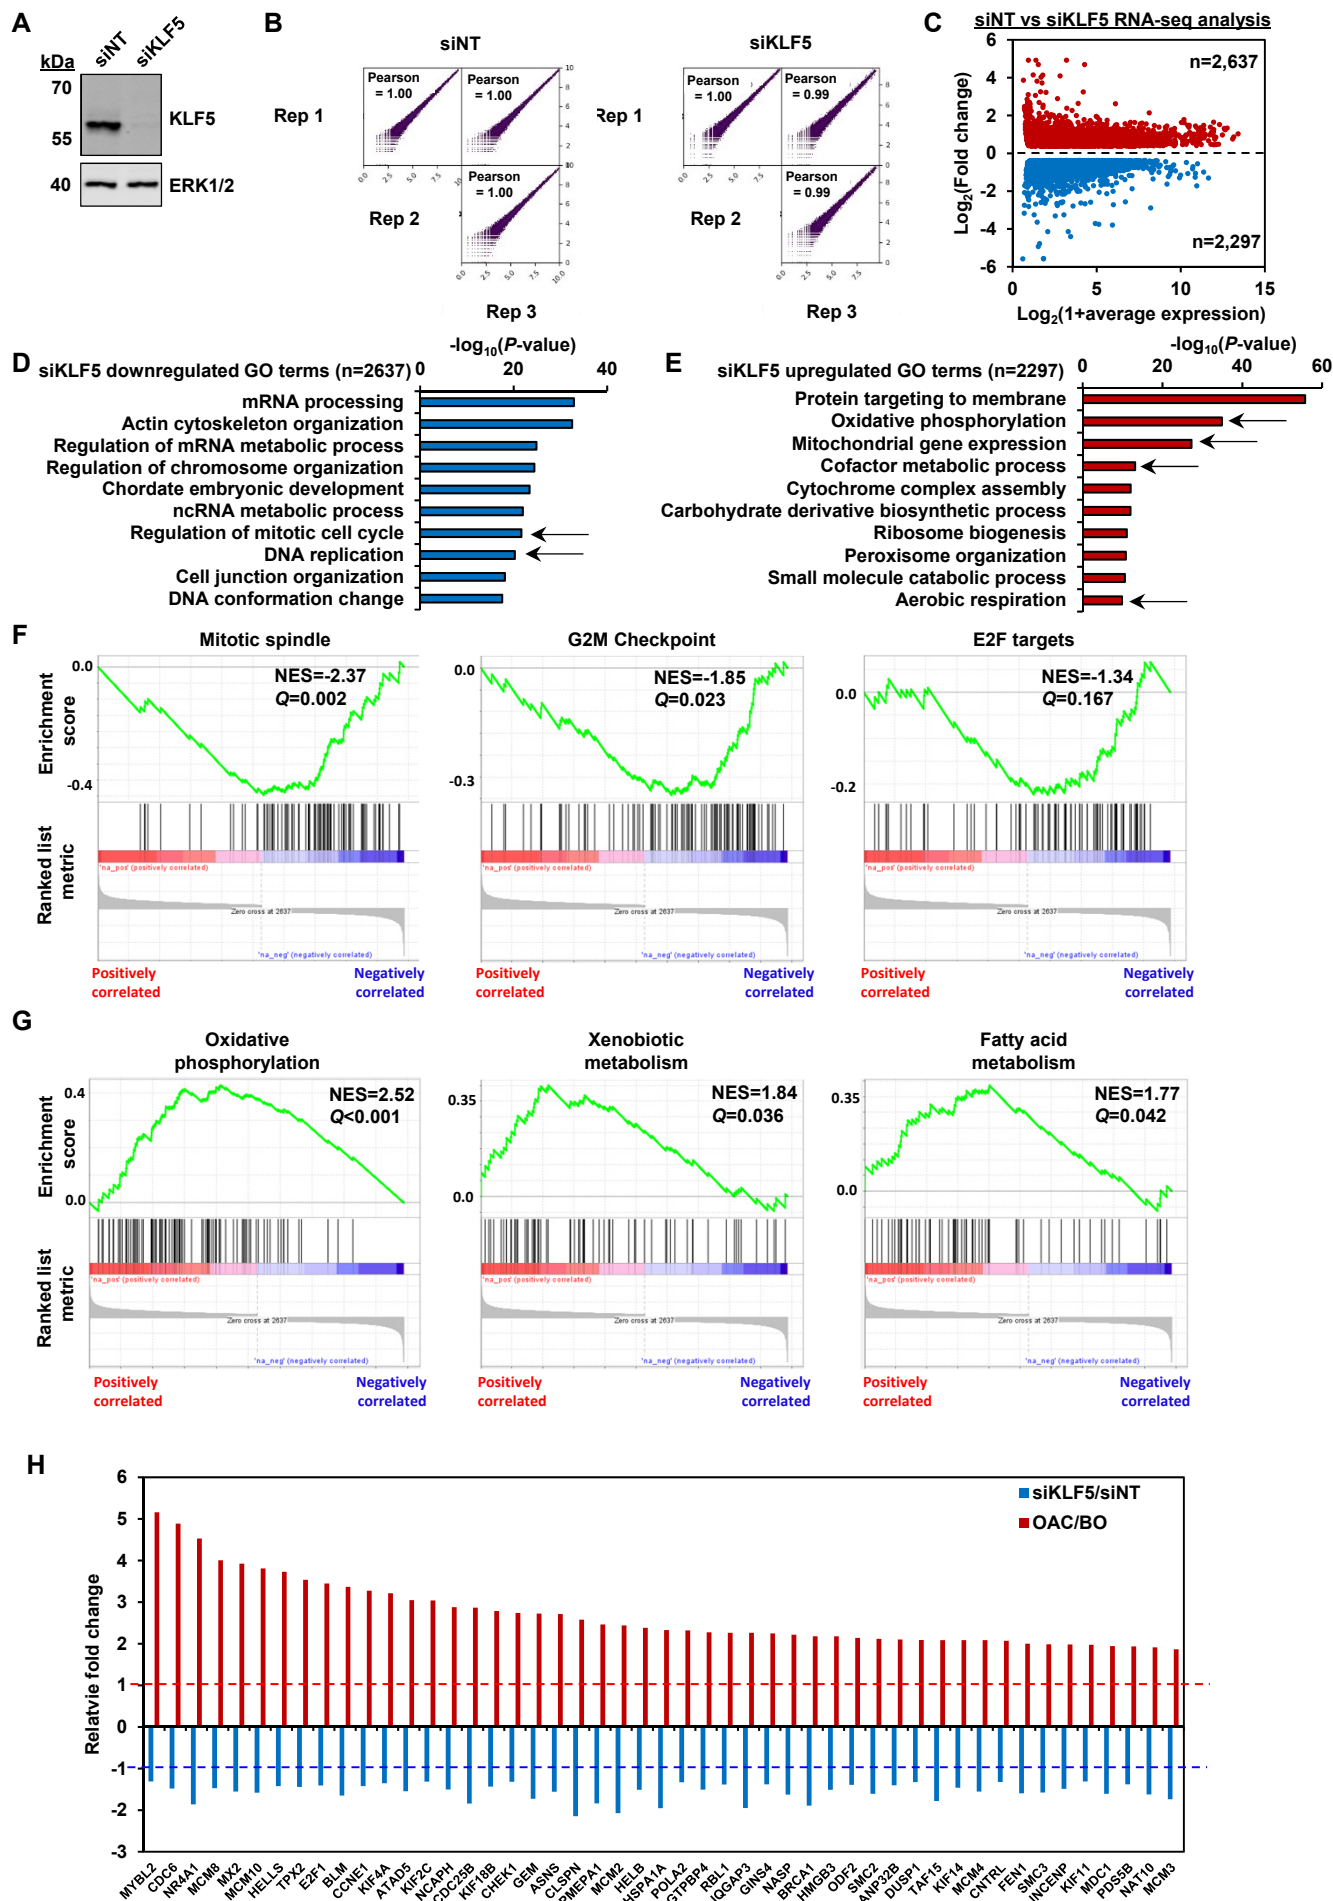

Figure 3- figure supplement 1.

Supplement: supp [file elife-57189-supp-v1.zip]
